# Supplementary material
Source: Springer Nature journal article supplement (https://www.springermedizin.de/resource/supplementary/12936_2012_2599_MOESM12_ESM.pdf/9542970)
Supplement: MOESM12 [file 9542970]

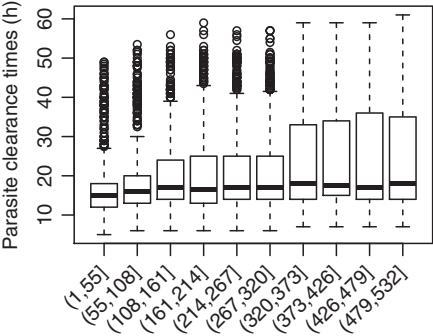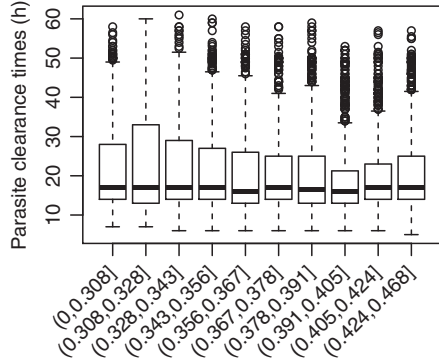

DHA EC<sub>50</sub> concentration (ng/mL) deciles

DHA k<sub>max</sub> deciles

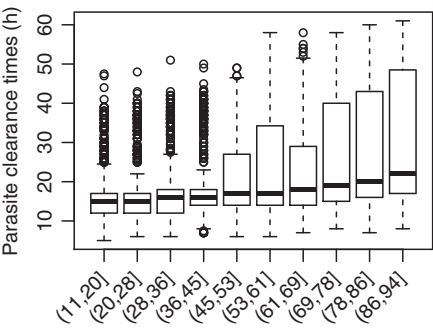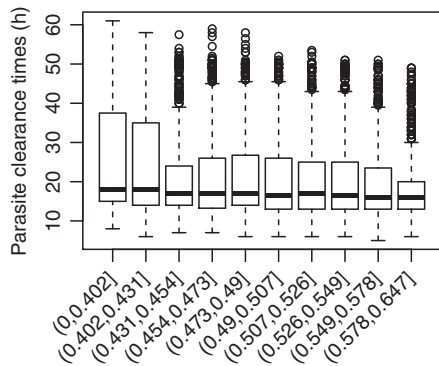

PQ EC<sub>50</sub> concentration (ng/mL) deciles

PQ k<sub>max</sub> deciles
